## Regional context for balancing sagebrush- and woodland-dependent songbird needs with targeted pinyon-juniper management in the sagebrush biome

Jason D. Tack<sup>1,\*</sup>, Joseph T. Smith<sup>2</sup>, Kevin E. Doherty<sup>3</sup>, Patrick J. Donnelly<sup>4</sup>, Jeremy D. Maestas<sup>5</sup>, Brady W. Allred<sup>2</sup>, Jason Reinhardt<sup>6</sup>, Scott L. Morford<sup>7</sup> & David E. Naugle<sup>2</sup>

<sup>1</sup>U.S. Fish and Wildlife Service, Habitat and Population Evaluation Team, 32 Campus Way, Missoula, MT, USA

<sup>2</sup>W.A. Franke College of Forestry and Conservation, University of Montana, 32 Campus Way Missoula, MT, USA

<sup>3</sup>U.S. Fish and Wildlife Service, Science Applications, 134 Union Blvd, Lakewood, CO, USA

<sup>4</sup>U.S. Fish and Wildlife Service, Intermountain West Joint Venture, 32 Campus Way, Missoula, MT, USA

<sup>5</sup>U.S. Department of Agriculture, Natural Resources Conservation Service, West National Technology Support Center, Portland, OR 97232

<sup>6</sup>U.S. Department of Agriculture, Forest Service, Rocky Mountain Research Station, Moscow, ID 83843

<sup>7</sup>Numerical Terradynamic Simulation Group, University of Montana, Missoula, MT 59812, USA

\*Corresponding author: Jason Tack, [jason\\_tack@fws.gov](mailto:jason_tack@fws.gov)

1 **Abstract**

2 Tree expansion among historic grassland and shrubland systems is a global phenomenon, which  
3 results in dramatic influences on ecosystem processes and wildlife populations. In the western  
4 US, pinyon-juniper woodlands have expanded by as much as six-fold among sagebrush steppe  
5 landscapes since the late nineteenth century, with demonstrated negative impacts to the behavior,  
6 demography, and population dynamics of species that rely on intact sagebrush rangelands.  
7 Notably, greater sage-grouse (*Centrocercus urophasianus*) are unable to tolerate even low  
8 conifer cover, which can result in population declines and local extirpation. Removing  
9 expanding conifer cover has been demonstrated to increase sage grouse population growth rates  
10 and sagebrush-obligate songbird abundance. However, advances in restoring sagebrush habitats  
11 have been met with concern about unintended impacts to species that rely on conifer woodlands,  
12 notably the pinyon jay (*Gymnorhinus cyanocephalus*) whose population declines are distinctive  
13 among birds breeding in pinyon-juniper woodlands. We modeled indices to abundance in  
14 relation to multi-scale habitat features for nine songbirds reliant on both sagebrush and pinyon-  
15 juniper woodlands for breeding. Findings demonstrate that targeted sage grouse habitat  
16 restoration under the Sage Grouse Initiative is not at odds with protection of pinyon jay  
17 populations. Rather, conifer management has largely occurred in the northern sagebrush  
18 ecosystem where models suggest that past cuts likely benefit Brewer's sparrow and sage thrasher  
19 while avoiding pinyon jay habitat. Extending our spatial modeling further south beyond the  
20 sagebrush biome could better equip conservationists with more comprehensive decision-support,  
21 particularly where pinyon jays face additional pressures of drought-induced tree mortality.

22 **Keywords:** Breeding Bird Survey (BBS), conifer management, species distribution models,  
23 pinyon jay, pinyon-juniper woodlands, sagebrush.

## 24 **Introduction**

25 Native tree species are expanding into shrublands and grasslands globally at an alarming rate,  
26 increasing from 40-600% in distribution across every continent except Antarctica (Nackley et al.,  
27 2017). Resulting shifts in vegetation structure and composition are affecting a broad suite of  
28 ecosystem services and values, including wildlife species of conservation concern (Baruch-  
29 Mordo et al., 2013; Fuhlendorf et al., 2017, 2002). In North America, pinyon-juniper  
30 woodlands, composed of both juniper (*Juniperus spp.*) and pinyon pine (*Pinus spp.*; hereafter  
31 collectively referred to as conifer), are among the most dominant vegetation types across the  
32 intermountain western United States, supporting critical biodiversity, ecosystem services, and  
33 economic potential (Romme et al., 2009). Since European settlement, the distribution of these  
34 conifer species has expanded between two- and six-fold, likely due to the compounding effects  
35 of historic high-intensity grazing, subsequent increases in natural fire return intervals that limited  
36 woodland establishment, and favorable climatic conditions that helped tree growth proliferate  
37 among sagebrush (*Artemisia spp.*) systems (Miller et al., 2019). Some 90% of pinyon-juniper  
38 expansion has occurred in sagebrush ecosystems (Miller et al., 2011), leading to a loss of  
39 sagebrush and herbaceous vegetation (Roundy et al., 2014) and associated specialist wildlife  
40 species (Baruch-Mordo et al., 2013; Rickart et al., 2008). As a result, management to remove  
41 conifers from former shrublands has been adopted as a widespread conservation practice to  
42 mitigate negative ecosystem impacts over the past decade (Miller et al., 2017).

43 Central to the proliferation of recent restoration efforts is the conservation of sagebrush-  
44 obligate wildlife under the umbrella of greater (*Centrocercus urophasianus*) and Gunnison sage-  
45 grouse (*C. minimus*; hereafter collectively referred to as sage grouse; Doherty et al., 2018; Miller  
46 et al., 2017). Sage grouse are particularly vulnerable to conifer expansion (Baruch-Mordo et al.,

47 2013). Conifer presence reduces the quality of sage grouse habitat through both behavioral  
48 avoidance by nesting females (Severson et al., 2017a) and the demographic consequences of  
49 reduced nest (Severson et al., 2017b), brood (Sandford et al., 2017), and female survival (Coates  
50 et al., 2017). Experimental research among conifer removal projects has demonstrated that sage  
51 grouse quickly return to restored habitats, with subsequent increases in nest, brood, and female  
52 survival in treated areas (Sandford et al., 2017; Severson et al., 2017b, 2017c). Ultimately,  
53 restoration of habitats through conifer management is translating into measurable population  
54 benefits at watershed scales, accounting for a 12% increase in population growth rates compared  
55 to control areas in southern Oregon (Olsen et al., 2021). Efficacy of accelerating investments in  
56 large-scale restoration efforts via conifer removal was one key factor in obviating the need for an  
57 Endangered listing status for sage grouse (US Fish and Wildlife Service 2015), which continues  
58 to be a primary management practice for voluntary conservation of sagebrush habitats (Natural  
59 Resources Conservation Service 2021).

60 Benefits from conifer removal targeted for sage grouse likely accrue for other sagebrush-  
61 obligate species, though few studies have actually measured resulting benefits of management  
62 across taxa (Bombaci and Pejchar, 2016; Zeller et al., 2021). Conifer removal projects for sage  
63 grouse have had a high congruence with the predicted distributions of certain sagebrush-obligate  
64 songbirds (Donnelly et al., 2017), and past management has resulted in local increases in  
65 abundances of shrubland species including Brewer's sparrow (*Spizella breweri*) and green-tailed  
66 towhee (*Pipilo chlorurus*; Holmes et al., 2017). Conversely, the potential for unintended  
67 negative impacts to species reliant on conifer woodlands remains a pervasive question, especially  
68 for non-target songbirds species of conservation concern (Boone et al., 2018; Zeller et al., 2021).

69           Among songbirds in the western US, those reliant on pinyon-juniper or sagebrush for  
70 breeding habitat have largely demonstrated contrasting population trends over the past 50 years  
71 that is consistent with an expanding footprint of conifer among sagebrush habitats (Table 1).  
72 Brewer’s sparrow, green-tailed towhee, and sage thrasher (*Oreoscoptes montanus*), all reliant on  
73 unfragmented sagebrush habitats for breeding, have experienced population declines; whereas  
74 woodland songbirds including ash-throated flycatcher (*Myiarchus cinerascens*), gray flycatcher  
75 (*Empidonax wrightii*), gray vireo (*Vireo vicinior*), and juniper titmouse (*Baeolophus ridgwayi*)  
76 exhibit stable to increasing populations (Sauer et al., 2017; Table 1). The one notable exception  
77 among woodland-reliant species is the pinyon jay (*Gymnorhinus cyanocephalus*), which depends  
78 on a mutualistic relationship with conifer nut production for their survival and reproduction  
79 (Ligon, 1978). Pinyon jays have declined more severely since 1968 than any other land bird  
80 inhabiting sagebrush-associated landscapes (Boone et al., 2018; Sauer et al., 2017), with concern  
81 culminating in the US Fish and Wildlife Service being petitioned to list the pinyon jay as  
82 Threatened or Endangered under the Endangered Species Act  
83 ([https://defenders.org/sites/default/files/inline-](https://defenders.org/sites/default/files/inline-files/2022.4.25_FWS_Listing%20petition_Pinyon%20Jay.pdf)  
84 [files/2022.4.25\\_FWS\\_Listing%20petition\\_Pinyon%20Jay.pdf](https://defenders.org/sites/default/files/inline-files/2022.4.25_FWS_Listing%20petition_Pinyon%20Jay.pdf); accessed 3 May, 2022).

85           Mechanisms underlying pinyon jay population declines within sagebrush ecosystems are  
86 unknown. Factors hypothesized to contribute to declines include climate-mediated declines in  
87 pinyon pine seed production, intentional pinyon-juniper removal, tree die-off, wildfire, and  
88 drought; and transition of the preferred heterogeneous pinyon pine and sagebrush stands to  
89 persistent woodlands by a process known as “infill” (Boone et al., 2018). Following the infill of  
90 mixed sagebrush and conifer stands, individual trees have reduced seed productivity, thus conifer  
91 infill may be analogously detrimental to pinyon jay as encroachment is to sagebrush-obligate

92 wildlife like the sage grouse (Fig. 1). Ultimately, improved spatial planning products for both  
93 sagebrush-and woodland-obligate birds of conservation concern are needed to enable informed  
94 decisions about potential impacts of ongoing management, and foster a holistic approach to  
95 multiple species management along the shrubland-to-woodland continuum (Maestas et al. 2021).

96 We used Breeding Bird Survey (BBS) data to develop spatial models predictive of the  
97 relative abundance of both sagebrush and woodland obligate songbirds inhabiting sagebrush  
98 steppe. Maps were developed to: 1) depict relative species distributions spatially, 2) evaluate  
99 recent conifer removal for sage grouse in relation to predicted songbird distributions, and 3) help  
100 guide spatial targeting of future conservation actions. Applying spatial models to BBS data  
101 provides an effective tool to learn about large-scale distribution of breeding birds (Niemuth et al.,  
102 2017). We chose to model species-habitat relationships among songbirds that are likely to be  
103 either passively targeted for conservation as sagebrush obligates, or influenced by conifer  
104 management, and typically appear in conservation planning documents (e.g., Gillihan, 2006).  
105 We overlaid past conifer cuts conducted through the Sage Grouse Initiative with predictive  
106 distributions of declining songbirds to determine if conifer management for sage grouse has  
107 passively targeted or avoided certain species.

## 108 **Methods**

### 109 *Study Area*

110 Our aim was to model species distributions inhabiting the sagebrush (*Artemisia* spp.) ecosystem  
111 within the western US. This geography encompasses a diversity of public and private land  
112 tenures and jurisdictional boundaries, and is largely defined by cover of both sagebrush- and  
113 grassland-dominant understories. Domestic livestock grazing is the primary land use among  
114 intact sagebrush steppe, while major anthropogenic factors contributing to habitat loss and

115 fragmentation vary spatially and include infrastructure associated with energy development,  
116 cultivation, and urban development. Persistent ecosystem threats also include invasion of exotic  
117 annual grasses (e.g. *Bromus tectorum*) and conifer expansion. To best capture a sampling frame  
118 representative of sagebrush landscapes, we merged boundaries defined by sagebrush cover with  
119 the addition of existing sage grouse Priority Areas for Conservation and management zones  
120 (Sage Grouse Initiative, n.d.) and the historic sage grouse species range (Runge et al., 2019;  
121 Supplemental Fig. 1).

#### 122 *Avian Count Data*

123 Selected species were those that are commonly identified in sagebrush and pinyon-juniper  
124 management plans including woodland obligates ash-throated flycatcher, gray flycatcher, gray  
125 vireo, juniper titmouse, and pinyon jay; and sagebrush-reliant Brewer's sparrow, green-tailed  
126 towhee, sagebrush sparrow (*Artemisiospiza nevadensis*) and sage thrasher (Table 1). We used  
127 point count data from the U.S. Geological Survey's Breeding Bird Survey (BBS), an annual  
128 roadside survey conducted from late May - early July by citizen-scientists skilled in avian  
129 identification (Pardieck et al., 2017). Along each survey route, participants conduct 50, 3-minute  
130 point counts approximately every 0.8km (i.e. ~40 km routes), and record every bird seen or  
131 heard within 400 m. We digitized stop locations using available information on stop descriptions.  
132 When stop descriptions were unavailable we generated equidistant points along routes between  
133 known stop locations, or between the beginning and ending points of survey routes when no stop  
134 locations for routes were available. In total, we had data available for 30,888 stops from 625  
135 BBS routes. We constrained our sample from 2011-2016 such that our response data could best  
136 match contemporary spatial predictor variables.

#### 137 *Spatial Covariates*

138 We broadly hypothesized that heterogeneity in species counts would be influenced by patterns of  
139 vegetation, topography, anthropogenic disturbance, fire history, and weather and climate (Table  
140 2). Specifically, we measured the proportion of summarized vegetation types around point  
141 counts that were classified as sagebrush, non-sagebrush shrublands, conifer, pinyon-juniper  
142 woodlands, scrub- and woodlands, and riparian areas (Table 2). We also combined cropland and  
143 developed cover types to characterize anthropogenically disturbed areas. Topography is an  
144 important component in structuring bird communities in sagebrush steppe (Knick et al., 2008), so  
145 we included measures of elevation, terrain ruggedness (TRI), and a multiscale topographic  
146 position index (mTPI) that broadly characterizes landforms (e.g. valley bottoms, ridges, etc.)  
147 within 270m, 810m, and 2430m, such that the metric can differentiate between both local- and  
148 broad-scale geomorphological features (Theobald et al., 2015). Fire is a pervasive disturbance  
149 among sagebrush steppe landscapes structuring vegetation patterns, with the potential for long-  
150 lasting negative impacts to densities of breeding birds (Holmes and Robinson, 2013).  
151 Therefore, we used spatial data of fire boundaries and measured the proportion of burned areas 5,  
152 10, and 15 years prior to each point count to characterize the potential legacy effects of fire.

153 We used weather and climate data that likely influence annual settling patterns of  
154 breeding birds. Because precipitation is the primary driver of annual herbaceous growth, we  
155 measured total precipitation occurring both over winter (Dec 1 - March 14) and spring (March 15  
156 - July 15) as our study area encompassed ecoregions where precipitation both largely occurs  
157 during winter (Great Basin) or spring and early summer (Great Plains). We also summarized  
158 patterns of temperature as mean maximum and minimum temperatures over the sampling period  
159 (May 15 - July 15) to characterize thermal niches for each species. We used the Normalized  
160 Difference Vegetation Index (NDVI) to broadly describe site productivity as NDVI has been



161 correlated with critical life stage requirements for breeding birds (Sweet et al., 2015). We  
162 calculated mean NDVI across Landsat scenes over the sampling period, and omitted pixels that  
163 were identified as cultivated or woodland in an effort to best characterize the productivity of  
164 sagebrush steppe habitats. Drought is a major factor shaping sagebrush steppe systems, so we  
165 used Palmer's Drought Severity Index (PDSI) to identify the spatial and temporal patterns of  
166 persistent, long-term drought across the study area. We matched all temporally-referenced  
167 weather and climate data to the year of observation across surveys. We also resampled all data  
168 to 120m resolution rasters for prediction as spatial covariates varied in their native resolutions  
169 (Table 1). Lastly, we included stop (1-50) as a covariate in all models as a proxy for time of day,  
170 which is known to influence detection of birds (Niemuth et al. 2017). All continuous covariates  
171 were scaled ( $\frac{x-\bar{x}}{s(x)}$ ) to aid model convergence and coefficient interpretation.

## 172 *Spatial and Temporal Scales*

173 We chose three spatial scales to summarize landcover and burned area covariates for  
174 consideration in modeling counts including 120 m, 1000 m, and 6400 m. The smallest scale  
175 (~4.5 ha) corresponds to minimum territory sizes of songbirds among sagebrush habitats  
176 (Rotenberry et al., 1999). Past work has demonstrated that the amount of shrub and grass cover  
177 within 1000 m scale (~314 ha) has been an important predictor of habitat selection for songbirds  
178 in sagebrush steppe (Rotenberry and Knick 1995). This buffer also matches the scale of a typical  
179 conifer removal project (e.g. [www://conservationalefforts.org](http://www.conservationalefforts.org)). Lastly, we hypothesized that a  
180 6400 m scale (~12,868 ha) represented watershed scale habitat influencing settling patterns by  
181 migratory passerines. Past research on sagebrush obligate response to conifer treatment  
182 indicated that treatments needed to be adjacent to large intact landscapes (> 14,000 ha) for  
183 sagebrush obligate songbirds to recolonize conifer removal areas (Knick et al. 2014).

184 *Model Fitting, Selection, and Evaluation*

185 Not all species distributions encompassed the entirety of our sampling frame, and we wanted to  
186 ensure that we were including only data in analyses that had the potential for a particular species  
187 to occur (i.e. 2nd order habitat selection; Johnson, 1980). Therefore, for each species we  
188 modeled only data from NACEC level 3 (CEC 1997) that contained >5 detections between 2011-  
189 2016, such that predictions are constrained within the occupied range of our sampling frame for  
190 each species (Supplemental Fig. 1).

191 We sought to use one spatial scale to represent each landcover variable, and one spatial  
192 and temporal scale to represent a fire variable for each species model. To determine the best fit  
193 scales, we fit generalized linear mixed models (glmm) using a binomial error distribution (i.e.  
194 detected, undetected) for each landcover and fire variable independently, including random  
195 effects for year, route, and BBS observer to account for known sources of heterogeneity in BBS  
196 count data (Niemuth et al., 2017). We used detection/non-detection data for scale selection so  
197 we wouldn't have to make assumptions about the proper error distribution for counts, and  
198 assumed that the inherent relationship between occurrence and abundance (Royle and Nichols,  
199 2003) would capture relevant variables for count-based models. Using glmm in this step allowed  
200 us to calculate Akaike Information Criteria (AIC), from which we used the minimum value  
201 among landcover and fire variables to determine the best spatial and temporal scale among  
202 variables. Once we had determined a set of candidate variables for each species, we identified  
203 highly correlated variables ( $|r| > 0.6$ ) and removed correlated variables that had lower support  
204 determined by higher AIC values.

205 Once candidate variables for each species were identified, we fit multi-variable models  
206 using a random forest approach with regression trees (Breiman, 2001). We modeled count data

207 with random forests regression trees because it was efficiently implemented without making  
208 assumptions about an appropriate error distribution and model structure across species, and is  
209 generally found to outperform parametric species distribution models in predictive performance  
210 (Elith, 2019).

211 We built regression models using 3000 trees, with a third of the total variables sampled at  
212 each split (the default for RF regression; Breiman, 2000). We used fixed categorical effects for  
213 years and included latitude and longitude as predictors across models. We evaluated the  
214 predictive capability of each species model using k-folds cross validation with 10 folds. For  
215 each fold across models we calculated a receiver operator characteristic (ROC) curve and  
216 calculated the area under the curve (AUC) by converting predicted counts to measure of  
217 occurrence assumed from a Poisson distribution (Royle and Nichols, 2003). We used the mean  
218 value of temporally-variant weather and climate predictors and stop number over the study  
219 duration, and used 2016-year intercept and fire data to generate spatial predictions for each  
220 species.

### 221 *Applying Models to Past Conifer Management*

222 Effectively targeted conifer management for both sagebrush and woodland songbirds would take  
223 place in areas with higher occurrence of imperiled sagebrush obligates, while avoiding similarly  
224 high occurrence areas for declining woodland-dependent species. To test the spatial relationship  
225 of past conifer management with songbird occurrences, we evaluated spatial data on conifer  
226 management projects from the US Department of Agriculture's Natural Resources Conservation  
227 Service, Sage Grouse Initiative (*hereafter* SGI). As one of the largest restoration efforts in the  
228 sagebrush biome since 2010 (Maestas et al. 2021, NRCS 2021), we considered SGI  
229 representative of modern conifer removal projects specifically targeted for sage grouse and

230 sagebrush ecosystem restoration. We extracted predicted values for declining species as  
231 identified by BBS (Brewer's sparrow, Sage Thrasher, Green-tailed Towhee, and Pinyon Jay)  
232 among the footprint of all SGI conifer treatments (n = 3342; mean = 549.7 ha), and among all the  
233 predicted values falling outside of treatment areas. We evaluated targeting of conifer  
234 management with logistic regression using treatment as the response variable (1 = treatment, 0 =  
235 no treatment), and predicted values for each species as the dependent variable. We reasoned that  
236 estimating a positive coefficient would be indicative of conifer management targeting for a  
237 particular species; in other words management was taking place in areas of higher predicted  
238 occurrence. Conversely, a negative coefficient would imply conifer management was ostensibly  
239 avoiding a particular species.

## 240 **Results**

241 Our sampling frame encompassed 24 ecoregions (Supplemental Fig. 1), of which focal species  
242 were determined to occupy from 7 (Gray Vireo) to 22 (Brewer's Sparrow) ecoregions within the  
243 sampling frame (Table 1, Supplemental Fig. 1). Omitting highly correlated variables, and using  
244 model selection to choose among spatial and temporal scales resulted in models with 22  
245 (Sagebrush Sparrow) to 30 (Brewer's Sparrow) candidate variables describing bird response to  
246 topography, weather and climate, landcover, and fire history (Table 3). The spatial and temporal  
247 windows selected for landcover and fire variables varied among species, ranging from local  
248 (120m) to landscape (6400m) and near (5 yr) and longer-term (15 yr) impacts of fire (Table 3),  
249 demonstrating heterogeneous responses by species to landscape features at multiple scales.  
250 Across species AUC scores indicated at least good predictive ability across all models  
251 (AUC>0.92; Supplemental Table 1). Applying models to spatial grids produced predictive  
252 surfaces of occurrence and abundance at landscape scales (Figs. 2-3).

253 Logistic regression models fit from overlaying SGI conifer management with models for  
254 declining species revealed that past cuts targeted areas with both Brewer's sparrow (3.468; 95%  
255 CI 3.408, 3.529) and sage thrasher (3.12; 95% CI 3.049, 3.198), and avoided pinyon jay (-0.018;  
256 95% CI -0.035, -0.002). Generally, SGI conifer management has been focused in northern  
257 distribution of the sagebrush ecosystem including areas in northwest Utah, northern California,  
258 and Oregon (Fig. 2).

## 259 **Discussion**

260 We provide the first habitat-based maps of songbird distribution and abundance for sagebrush-  
261 and woodland-dependent species of high concern across the entire sagebrush biome. These new  
262 products expand the spatial targeting toolbox beyond high-profile birds like sage grouse  
263 (Doherty et al., 2016, 2010; Row et al., 2018) to empower land managers to incorporate multiple  
264 species into holistic conservation strategies. To further aid conservation planning, map-based  
265 models are made available for visualization using an online application  
266 (<https://map.sagegrouseinitiative.com/>).

267 Sage grouse have been identified as an umbrella species for wildlife conservation among  
268 sagebrush habitats, an assumption that has been tested with mixed results by measuring the co-  
269 occurrence of overlapping species distributions. Generally, distribution and abundance of sage  
270 grouse have been found to correspond with other sagebrush-dependent wildlife at regional and  
271 biome-level scales (Hanser and Knick, 2011; Pilliod et al., 2020; Rowland et al., 2006; Smith et  
272 al., 2019); though results become equivocal for more localized investigations of overlap (Carlisle  
273 et al., 2018; Carlisle and Chalfoun, 2020; Smith et al., 2021). Perhaps a more meaningful  
274 surrogate measure is to test benefits afforded to multiple species under conservation actions  
275 intended to benefit a flagship species such as the sage grouse. We found that conifer removal

276 targeted for sage grouse through SGI also targeted important habitats for declining sagebrush  
277 obligate songbirds, a guild of species with a proclivity for positive response to management  
278 (Holmes et al., 2017). Community-level benefits from targeted conifer removal is encouraging  
279 yet not surprising given similar findings demonstrating high overlap between Brewer’s sparrow  
280 and SGI conifer removal (Donnelly et al., 2017), and research demonstrating that landscapes  
281 across all US sagebrush steppe habitats targeted for sage grouse conservation (i.e. Priority Areas  
282 for Conservation) have been judiciously designed in light of affording protections to sagebrush-  
283 reliant wildlife communities (Runge et al., 2019).

284         Our results also reveal that conifer removal efforts targeted for sage grouse largely avoid  
285 areas of high predicted occurrence for pinyon jay. These findings provide the first quantitative  
286 assessment demonstrating that targeted sage grouse habitat restoration under one of the largest  
287 conservation initiatives in the biome does not appear to be at odds with protecting pinyon jay  
288 populations across most of the sagebrush biome despite suggestions to the contrary (Boone et al.,  
289 2018; Magee et al., 2019). This disparity is explained in part by the SGI’s private lands  
290 emphasis and science-based approach that prioritizes removal of early successional conifer  
291 expansion among shrub and herbaceous dominated landscapes (Falkowski et al., 2017; Reinhardt  
292 et al., 2017). Colloquially known as “phase 1” woodlands (Miller and Miller, 2007), these areas  
293 are characterized by expansion of conifers into shrublands historically devoid of trees, which are  
294 used by pinyon jays in some areas mainly for food caching (Boone et al. 2021). Even with the  
295 increased attention in sage grouse focused conifer projects over the past decade, the combined  
296 effects of management and wildfire are estimated to have only reduced the conifer footprint by  
297 1.6% across the entire sage grouse range (Reinhardt et al. 2020). This pace and scale of removal

298 may barely be keeping up with continued patterns of expansion and infill, which is estimated at  
299 0.4-1.5% annually (Sankey and Germino, 2008).

300         One area meriting further investigation is the situation in the Central Basin and Range  
301 Ecoregion where the highest concentrations of pinyon jay occur, and contemporary pinyon-  
302 juniper woodland change is affecting habitat conditions for pinyon jay and sage grouse. In  
303 recent decades, pinyon-juniper woodlands in this region have continued to undergo extensive  
304 change in stand structure and composition due to increasing conifer densities (Filippelli et al.  
305 2020), resulting in the infill of shrub and tree co-dominant stands (Miller et al., 2008; Romme et  
306 al., 2009). Preferred pinyon jay breeding habitat is often described as heterogenous stands of  
307 pinyon-juniper and shrubs, that support high cone pine productivity and resulting pinyon nut  
308 production (Balda, 2002). Pinyon pine tree vigor, a surrogate for tree productivity, was an  
309 important predictor of pinyon jay nest-site selection, which declined with increasing tree size and  
310 density (Johnson et al., 2017). Given changing woodland conditions, we hypothesize that pinyon  
311 jay habitat use may be shifting to encroached sagebrush shrublands as historic woodland  
312 ecological sites become less suitable - an outcome that imperils both pinyon jay and sage grouse  
313 which historically occupied different niches and ecological sites along the shrubland-to-  
314 woodland continuum (Fig. 1). This hypothesis is consistent with regional population trends  
315 showing sagebrush obligate birds and pinyon jay in decline, while species reliant on dense,  
316 persistent woodlands have increased (Table 1). Simply avoiding conifer removal projects in  
317 occupied pinyon jay habitats is unlikely to be effective with ongoing woodland dynamics, so it  
318 may instead be beneficial for managers to consider site-appropriate silvicultural prescriptions  
319 designed to restore and maintain the heterogeneous woodland structure critical to pinyon jays.  
320 Co-produced science and monitoring should be coupled with any such restoration efforts (Naugle

321 et al. 2020) to help overcome existing knowledge gaps in woodland restoration (Boone et al.  
322 2018).

323 Evaluation metrics suggested that all species models provided “good” predictive  
324 capability across a large geography. However, there are several important caveats when using  
325 BBS data to develop spatial models. Notably, BBS sampling occurs along roadways, which  
326 could bias the habitats and bird communities observed, and without repeated samples provides  
327 only an index to abundance. Past studies within our sampling frame have found no significant  
328 differences between counts of sagebrush obligates on road and off-road surveys (Rotenberry and  
329 Knick, 1995), nor performance of spatial models applied to data when comparing BBS with  
330 samples collected off-roads (Mccarthy et al., 2012). Though it remains possible that the entire  
331 covariate space (i.e. niche) was not fully sampled for each species by constricting surveys to road  
332 sides (e.g. high elevation roadless sites). Ultimately indices such as relative abundance from  
333 BBS data can still provide management with meaningful information on patterns of avian  
334 occurrence (Johnson, 2008; Niemuth et al., 2017), particularly when it represents the primary  
335 data source available at the temporal and spatial scales relevant to management. Viewed in total,  
336 local and design-based studies that employ random sampling and account for detection  
337 probability will only improve the quality of spatial planning tools for practitioners, and should be  
338 used when available. Similarly, model-based inference at the biome scale will never surpass  
339 local knowledge or site evaluation prior to management when it comes to sensitive resources  
340 (e.g. location of a particular nesting colony; Johnson et al., 2016).

341 Management actions to reduce conifer for purposes other than sagebrush ecosystem  
342 restoration (e.g. fuels reduction) may not be similarly inconsequential for pinyon jay  
343 conservation, particularly when treatments occur among established pinyon-juniper woodlands.



344 For example, thinning conifers to reduce fire risk in New Mexico, USA left previously-suitable  
345 pinyon jay nesting habitat unoccupied following treatment (Johnson et al., 2018) and conifer  
346 thinning in Colorado reduced pinyon jay occupancy at local scales (<4 ha), though treatments  
347 also resulted increased pinyon jay occupancy at the scale of management (18-117 ha; Magee et  
348 al., 2019), highlighting the importance of landscape-level considerations. Both studies  
349 documenting impacts to pinyon jay from conifer removal were outside the occupied range of  
350 sage grouse (Schroeder et al., 2004). Thus, extending our spatial modeling approach for the  
351 pinyon jay distribution beyond the sagebrush biome could better equip conservationists in  
352 southwestern ecoregions with important decision-support tools, particularly as these landscapes  
353 face additional pressures of drought-induced tree mortality (Clifford et al., 2011; Fair et al.,  
354 2018, Shiver et al. 2021).

### 355 **Implications**

356 Pinyon-juniper management is often framed as creating “winners” and “losers” among wildlife  
357 species (Bombaci and Pejchar, 2016; Zeller et al., 2021), but spatial context of management  
358 efforts relative to species populations is often lacking to assess this beyond local project scales.  
359 In fact, nuanced analysis reveals that targeted removal of post-settlement era conifer  
360 encroachment in sagebrush shrublands may not be at odds with species that rely on conifers for a  
361 portion of their life history (Anthony and Sanchez, 2019; Maestas et al., 2019). Model outputs  
362 developed here can help inform management for an additional suite of species of concern that  
363 lack the spatial tools necessary to avoid potentially detrimental impacts and target limited  
364 resources for restoration. Future efforts could combine our species models with spatial data on  
365 known ecosystem threats and potential risks to populations to develop holistic, multi-species  
366 management plans. For example, combining species models with high resolution vegetation data

367 (Allred et al., 2021; Rigge et al., 2020) can help practitioners make optimal decisions given a  
368 bevy of seemingly competing conservation and management interests (Reinhardt et al., 2017;  
369 Ricca et al., 2018).

### 370 **Acknowledgements**

371 We are grateful to the many volunteers and staff that support the collection and  
372 distribution of data for the Breeding Bird Survey. The Western Association of Fish and Wildlife  
373 Agencies provided support through the Sagebrush Science Initiative. C. Wiggins identified BBS  
374 stop locations, and S. Somershoe, S. Fields, M. Estey, R. Pritchert, and K. Barnes all provided  
375 helpful input. N. Niemuth provided invaluable guidance on the framing of the analyses and  
376 writing of the manuscript. The findings and conclusions in this article are those of the authors  
377 and do not necessarily represent the views of the U.S. Fish and Wildlife Service. The findings  
378 and conclusions in this article are those of the authors and should not be construed to represent  
379 any official USDA or U.S. Government determination or policy.

### 380 **Literature Cited**

381 Abatzoglou, J.T., McEvoy, D.J., Redmond, K.T., 2017. The West Wide Drought Tracker:  
382 Drought Monitoring at Fine Spatial Scales. *Bull. Am. Meteorol. Soc.* 98, 1815–1820.

383 Allred, B.W., Bestelmeyer, B.T., Boyd, C.S., Brown, C., Davies, K.W., Duniway, M.C.,  
384 Ellsworth, L.M., Erickson, T.A., Fuhlendorf, S.D., Griffiths, T.V., Jansen, V., Jones, M.O.,  
385 Karl, J., Knight, A., Maestas, J.D., Maynard, J.J., McCord, S.E., Naugle, D.E., Starns, H.D.,  
386 Twidwell, D., Uden, D.R., 2021. Improving Landsat predictions of rangeland fractional  
387 cover with multitask learning and uncertainty. *Methods Ecol. Evol.* 12, 841-849.

388 Anthony, C.R., Sanchez, D.M., 2019. Resource selection and space use of *Myotis evotis* in a  
389 western juniper woodland in Oregon. *J. Mammal.* 100, 239–248.

- 390 Balda, R.P., 2002. Pinyon Jay (*Gymnorhinus cyanocephalus*). Birds North America.  
391 <https://doi.org/10.2173/bna.605>
- 392 Baruch-Mordo, S., Evans, J.S., Severson, J.P., Naugle, D.E., Maestas, J.D., Kiesecker, J.M.,  
393 Falkowski, M.J., Hagen, C.A., Reese, K.P., 2013. Saving sage-grouse from the trees: A  
394 proactive solution to reducing a key threat to a candidate species. Biol. Conserv. 167, 233–  
395 241.
- 396 Bombaci, S., Pejchar, L., 2016. Consequences of pinyon and juniper woodland reduction for  
397 wildlife in North America. For. Ecol. Manage. 365, 34–50.
- 398 Boone, J.D., Ammon, E., Johnson, K., 2018. Long-term declines in the Pinyon Jay and  
399 management implications for piñon–juniper woodlands, in: Shuford, W.D., Gill, R.E.,  
400 Handel, C.M. (Eds.), Trends and Traditions: Avifaunal Change in Western North America.  
401 Western Field Ornithologists, pp. 190–197.
- 402 Boone, J.D., Witt, C., Ammon, E.M., 2021. Behavior-specific occurrence patterns of Pinyon Jays  
403 (*Gymnorhinus cyanocephalus*) in three Great Basin study areas and significance for pinyon-  
404 juniper woodland management. PLoS One 16, e0237621.
- 405 Breiman, L., 2001. Random Forests. Mach. Learn. 45, 5–32.
- 406 Carlisle, J.D., Chalfoun, A.D., 2020. The abundance of Greater Sage-Grouse as a proxy for the  
407 abundance of sagebrush-associated songbirds in Wyoming, USA. Avian Conserv.  
408 Ecol./Ecol. Conserv. 15, 16.
- 409 Carlisle, J.D., Keinath, D.A., Albeke, S.E., Chalfoun, A.D., 2018. Identifying holes in the greater  
410 sage-grouse conservation umbrella. J. Wildl. Manage. 82, 948–957.
- 411 Clifford, M.J., Cobb, N.S., Buenemann, M., 2011. Long-Term Tree Cover Dynamics in a  
412 Pinyon-Juniper Woodland: Climate-Change-Type Drought Resets Successional Clock.

- 413 Ecosystems 14, 949–962.
- 414 Coates, P.S., Prochazka, B.G., Ricca, M.A., Gustafson, K.B., Ziegler, P., Casazza, M.L., 2017.
- 415 Pinyon and Juniper Encroachment into Sagebrush Ecosystems Impacts Distribution and
- 416 Survival of Greater Sage-Grouse. *Rangeland Ecol. Manage.* 70, 25–38.
- 417 Commission for Environmental Cooperation, 1997. Ecological regions of North America:
- 418 Toward a common perspective. Montreal, Quebec. The Commission.
- 419 Doherty, K.E., Evans, J.S., Coates, P.S., Juliusson, L.M., Fedy, B.C., 2016. Importance of
- 420 regional variation in conservation planning: a rangewide example of the Greater Sage-
- 421 Grouse. *Ecosphere*. <https://doi.org/10.1002/ecs2.1462>
- 422 Doherty, K.E., Hennig, J.D., Dinkins, J.B., Griffin, K.A., Cook, A.A., Maestas, J.D., Naugle,
- 423 D.E., Beck, J.L., 2018. Understanding biological effectiveness before scaling up range-wide
- 424 restoration investments for Gunnison sage-grouse. *Ecosphere* 9, e02144.
- 425 Doherty, K.E., Tack, J.D., Evans, J.S., Naugle, D.E., 2010. Mapping breeding densities of
- 426 greater sage-grouse: a tool for range-wide conservation planning. Completion report to the
- 427 Bureau of Land Management for Interagency Agreement.
- 428 Donnelly, J.P., Tack, J.D., Doherty, K.E., Naugle, D.E., Allred, B.W., Dreitz, V.J., 2017.
- 429 Extending Conifer Removal and Landscape Protection Strategies from Sage-grouse to
- 430 Songbirds, a Range-Wide Assessment. *Rangeland Ecol. Manage.* 70, 95–105.
- 431 Eidenshink, J., Schwind, B., Brewer, K., Zhu, Z.-L., Quayle, B., Howard, S., 2007. A Project for
- 432 Monitoring Trends in Burn Severity. *Fire Ecology* 3, 3–21.
- 433 Elith, J., 2019. 15-Machine Learning, Random Forests, and Boosted Regression Trees.
- 434 Quantitative analyses in wildlife science 281.
- 435 Fair, J.M., Hathcock, C.D., Bartlow, A.W., 2018. Avian communities are decreasing with piñon

- 436 pine mortality in the southwest. *Biol. Conserv.* 226, 186–195.
- 437 Falkowski, M.J., Evans, J.S., Naugle, D.E., Hagen, C.A., Carleton, S.A., Maestas, J.D.,  
438 Khalyani, A.H., Poznanovic, A.J., Lawrence, A.J., 2017. Mapping Tree Canopy Cover in  
439 Support of Proactive Prairie Grouse Conservation in Western North America. *Rangeland*  
440 *Ecol. Manage.* 70, 15–24.
- 441 Filippelli, S.K., Falkowski, M.J., Hudak, A.T., Fekety, P.A., Vogeler, J.C., Khalyani, A.H., Rau,  
442 B.M. and Strand, E.K., 2020. Monitoring pinyon-juniper cover and aboveground biomass  
443 across the Great Basin. *Environmental Research Letters*, 15(2), p.025004.
- 444 Fuhlendorf, S.D., Hovick, T.J., Elmore, R.D., Tanner, A.M., Engle, D.M., Davis, C.A., 2017. A  
445 Hierarchical Perspective to Woody Plant Encroachment for Conservation of Prairie-  
446 Chickens. *Rangeland Ecol. Manage.* 70, 9–14.
- 447 Fuhlendorf, S.D., Woodward, A.J.W., Leslie, D.M., Shackford, J.S., 2002. Multi-scale effects of  
448 habitat loss and fragmentation on lesser prairie-chicken populations of the US Southern  
449 Great Plains. *Landsc. Ecol.* 17, 617–628.
- 450 Gesch, D., Oimoen, M., Greenlee, S., Nelson, C., Steuck, M., Tyler, D., 2002. The national  
451 elevation dataset. *Photogramm. Eng. Remote Sens.* 68, 5–32.
- 452 Gillihan, S.W., 2006. Sharing the land with pinyon-juniper birds. Utah Division of Wildlife  
453 Resources. Partners in Flight Western Working Group. Salt Lake City, Utah.
- 454 Hanser, S.E., Knick, S.T., 2011. Greater sage-grouse as an umbrella species for shrubland  
455 passerine birds: a multiscale assessment. S.T. Knick, J.W. Connelly (Eds.), Greater sage-  
456 grouse: ecology and conservation of a landscape species and its habitats, University of  
457 California Press, Berkeley, CA, USA (2011), pp. 475-487.
- 458 Holmes, A.L., Maestas, J.D., Naugle, D.E., 2017. Bird Responses to Removal of Western

- 459 Juniper in Sagebrush-Steppe. *Rangeland Ecol. Manage.* 70, 87–94.
- 460 Holmes, A.L., Robinson, W.D., 2013. Fire mediated patterns of population densities in mountain  
461 big sagebrush bird communities. *J. Wildl. Manage.* 77, 737–748.
- 462 Johnson, D.H., 2008. In Defense of Indices: The Case of Bird Surveys. *J. Wildl. Manage.* 72,  
463 857–868.
- 464 Johnson, D.H., 1980. The Comparison of Usage and Availability Measurements for Evaluating  
465 Resource Preference. *Ecology* 61, 65–71.
- 466 Johnson, K., Neville, T.B., Smith, J.W., Horner, M.W., 2016. Home range- and colony-scale  
467 habitat models for Pinyon Jays in piñon-juniper woodlands of New Mexico, USA. *ACE* 11.  
468 <https://doi.org/10.5751/ACE-00890-110206>
- 469 Johnson, K., Petersen, N., Smith, J., Sadoti, G., 2018. Pinon-juniper fuels reduction treatment  
470 impacts pinyon jay nesting habitat. *Global Ecology and Conservation* 16, e00487.
- 471 Johnson, K., Sadoti, G., Smith, J., 2017. Weather-induced declines in piñon tree condition and  
472 response of a declining bird species. *J. Arid Environ.* 146, 1–9.
- 473 Knick, S.T., Rotenberry, J.T., Leu, M., 2008. Habitat, topographical, and geographical  
474 components structuring shrubsteppe bird communities. *Ecography* 31, 389–400.
- 475 Ligon, J.D., 1978. Reproductive Interdependence of Pinon Jays and Pinon Pines. *Ecol. Monogr.*  
476 48, 111–126.
- 477 Maestas, J.D., Hagen, C.A., Smith, J.T., Tack, J.D., Allred, B.W., Griffiths, T., Bishop, C.J.,  
478 Stewart, K.M., Naugle, D.E., 2019. Mule deer juniper use is an unreliable indicator of  
479 habitat quality: Comments on Coe et al. (2018). *Jour. Wild. Mgmt.* 83, 755–762.
- 480 Maestas, J. D., D. E. Naugle, J. C. Chambers, J. D. Tack, C. S. Boyd, and J. M. Tague, 2021,  
481 Chapter M. Conifer Expansion, in T. E. Remington, P. A. Deibert, S. E. Hanser, D. M.

- 482 Davis, L. A. Robb, and J. L. Welty, eds., Sagebrush conservation strategy—Challenges to  
483 sagebrush conservation: U.S. Geological Survey Open-File Report 2020–1125:  
484 doi:<https://doi.org/10.3133/ofr20201125>.
- 485 Magee, P.A., Coop, J.D., Ivan, J.S., 2019. Thinning alters avian occupancy in piñon–juniper  
486 woodlands. *Condor* 121, 1-17.
- 487 McCarthy, K.P., Fletcher, R.J., Jr, Rota, C.T., Hutto, R.L., 2012. Predicting species distributions  
488 from samples collected along roadsides. *Conserv. Biol.* 26, 68–77.
- 489 Miller, R.F., Chambers, J.C., Evers, L., Williams, C.J., Snyder, K.A., Roundy, B.A., Pierson,  
490 F.B., 2019. The ecology, history, ecohydrology, and management of pinyon and juniper  
491 woodlands in the Great Basin and Northern Colorado Plateau of the western United States.  
492 Gen. Tech. Rep. RMRS-GTR-403. Fort Collins, CO: US Department of Agriculture, Forest  
493 Service, Rocky Mountain Research Station. 284 p. 403.
- 494 Miller, R.F., Knick, S.T., Pyke, D.A., Meinke, C.W., Hanser, S.E., Wisdom, M.J., Hild, A.L.,  
495 2011. Characteristics of sagebrush habitats and limitations to long-term conservation.  
496 Greater sage-grouse: ecology and conservation of a landscape species and its habitats.  
497 *Studies in Avian Biology* 38, 145–184.
- 498 Miller, R.F., Miller, R.F., 2007. Western juniper field guide: asking the right questions to select  
499 appropriate management actions. US Geological Survey Reston, VA, USA.
- 500 Miller, R.F., Naugle, D.E., Maestas, J.D., Hagen, C.A., Hall, G., 2017. Special Issue: Targeted  
501 Woodland Removal to Recover at-Risk Grouse and Their Sagebrush-Steppe and Prairie  
502 Ecosystems. *Rangeland Ecol. Manage.* 70, 1–8.
- 503 Miller, R.F., Tausch, R.J., McArthur, E.D., Johnson, D.D., Sanderson, S.C., 2008. Age structure  
504 and expansion of piñon–juniper woodlands: a regional perspective in the Intermountain

- 505 West. Res. Pap. RMRS-RP-69. Fort Collins, CO: US Department of Agriculture, Forest  
506 Service, Rocky Mountain Research Station. 15 p. 69.
- 507 Nackley, L.L., West, A.G., Skowno, A.L., Bond, W.J., 2017. The Nebulous Ecology of Native  
508 Invasions. *Trends Ecol. Evol.* 32, 814–824.
- 509 Natural Resources Conservation Service. 2021. A decade of science support in the sagebrush  
510 biome. United States Department of Agriculture. Washington, D.C. 32 pp.  
511 <https://doi.org/10.327488985>.
- 512 Naugle, D.E., B. W. Allred, M. O. Jones, D. Twidwell, J. D. Maestas. 2020. Coproducing  
513 science to inform working lands: the next frontier in nature conservation. *BioScience* 70,  
514 90-96.
- 515 Niemuth, N.D., Estey, M.E., Fields, S.P., Wangler, B., Bishop, A.A., Moore, P.J., Grosse, R.C.,  
516 Ryba, A.J., 2017. Developing spatial models to guide conservation of grassland birds in the  
517 U.S. Northern Great Plains. *Condor* 119, 506–525.
- 518 Olsen, A.C., Severson, J.P., Maestas, J.D., Naugle, D.E., Smith, J.T., Tack, J.D., Yates, K.H.,  
519 Hagen, C.A., 2021. Reversing tree expansion in sagebrush steppe yields population- level  
520 benefit for imperiled grouse. *Ecosphere* 12. <https://doi.org/10.1002/ecs2.3551>
- 521 Pardieck, K.L., Ziolkowski, D.J., Jr, Lutmerding, M., Campbell, K., R, H.M.A., 2017. North  
522 american breeding bird survey dataset 1966-2016, version 2016.0. US Geological Survey,  
523 Patuxent Wildlife Research Center; doi:10.5066/F7W0944J.
- 524 Pilliod, D.S., Jeffries, M.I., Arkle, R.S., Olson, D.H., 2020. Reptiles under the conservation  
525 umbrella of the greater sage- grouse. *J. Wildl. Manage.* 84, 478–491.
- 526 Reinhardt, J.R., Naugle, D.E., Maestas, J.D., Allred, B., Evans, J., Falkowski, M., 2017. Next-  
527 generation restoration for sage-grouse: a framework for visualizing local conifer cuts within



528 a landscape context. *Ecosphere* 8, e01888.

529 Ricca, M.A., Coates, P.S., Gustafson, K.B., Brussee, B.E., Chambers, J.C., Espinosa, S.P.,  
530 Gardner, S.C., Lisius, S., Ziegler, P., Delehanty, D.J., Others, 2018. A conservation  
531 planning tool for greater sage-grouse using indices of species distribution, resilience, and  
532 resistance. *Ecol. Appl.*

533 Rickart, E.A., Robson, S.L., Heaney, L.R., 2008. *Mammals Of Great Basin National Park,*  
534 *Nevada: Comparative Field Surveys and Assessment Of Faunal Change. Monogr. West. N.*  
535 *Am. Nat.* 4, 77–114.

536 Rigge, M., Homer, C., Cleeves, L., Meyer, D.K., Bunde, B., Shi, H., Xian, G., Schell, S., Bobo,  
537 M., 2020. Quantifying Western U.S. Rangelands as Fractional Components with Multi-  
538 Resolution Remote Sensing and In Situ Data. *Remote Sensing* 12, 412.

539 Riley, S.J., 1999. Index that quantifies topographic heterogeneity. *Intermt. J. Sci.* 5, 23–27.

540 Rollins, M.G., 2009. LANDFIRE: a nationally consistent vegetation, wildland fire, and fuel  
541 assessment. *Int. J. Wildland Fire* 18, 235–249.

542 Romme, W.H., Allen, C.D., Bailey, J.D., Baker, W.L., Bestelmeyer, B.T., Brown, P.M.,  
543 Eisenhart, K.S., Floyd, M.L., Huffman, D.W., Jacobs, B.F., Miller, R.F., Muldavin, E.H.,  
544 Swetnam, T.W., Tausch, R.J., Weisberg, P.J., 2009. Historical and Modern Disturbance  
545 Regimes, Stand Structures, and Landscape Dynamics in Piñon–Juniper Vegetation of the  
546 Western United States. *Rangeland Ecol. Manage.* 62, 203–222.

547 Rotenberry, J.T., Knick, S.T., 1995. Evaluation of bias in roadside point count surveys of  
548 passerines in shrubsteppe and grassland habitats in southwestern Idaho. In: Ralph, C. John;  
549 Sauer, John R. ; Droege, Sam, technical editors. 1995. *Monitoring bird populations by point*  
550 *counts. Gen. Tech. Rep. PSW-GTR-149. Albany, CA: US Department of Agriculture,*

- 551 Forest Service, Pacific Southwest Research Station: p. 99-102 149.
- 552 Rotenberry, J.T., Patten, M.A., Preston, K.L., 1999. Brewer's Sparrow (*Spizella breweri*). Birds  
553 North America. <https://doi.org/10.2173/bna.390>
- 554 Roundy, B.A., Miller, R.F., Tausch, R.J., Young, K., Hulet, A., Rau, B., Jessop, B., Chambers,  
555 J.C., Eggett, D., 2014. Understory cover responses to pinon--juniper treatments across tree  
556 dominance gradients in the Great Basin. *Rangeland Ecol. Manage.* 67, 482–494.
- 557 Row, J.R., Doherty, K.E., Cross, T.B., Schwartz, M.K., Oyler-McCance, S.J., Naugle, D.E.,  
558 Knick, S.T., Fedy, B.C., 2018. Quantifying functional connectivity: The role of breeding  
559 habitat, abundance, and landscape features on range-wide gene flow in sage-grouse.  
560 *Evolutionary Applications.* 11, 1305-1321.
- 561 Rowland, M.M., Wisdom, M.J., Suring, L.H., Meinke, C.W., 2006. Greater sage-grouse as an  
562 umbrella species for sagebrush-associated vertebrates. *Biol. Conserv.* 129, 323–335.
- 563 Royle, J.A., Nichols, J.D., 2003. Estimating abundance from repeated presence–absence data or  
564 point counts. *Ecology* 84, 777–790.
- 565 Runge, C.A., Withey, J.C., Naugle, D.E., Fargione, J.E., Helmstedt, K.J., Larsen, A.E.,  
566 Martinuzzi, S., Tack, J.D., 2019. Single species conservation as an umbrella for  
567 management of landscape threats. *PLoS One* 14, e0209619.
- 568 Sandford, C.P., Kohl, M.T., Messmer, T.A., Dahlgren, D.K., Cook, A., Wing, B.R., 2017.  
569 Greater Sage-Grouse Resource Selection Drives Reproductive Fitness Under a Conifer  
570 Removal Strategy. *Rangeland Ecol. Manage.* 70, 59–67.
- 571 Sankey, T.T., Germino, M.J., 2008. Assessment of Juniper Encroachment With The Use of  
572 Satellite Imagery and Geospatial Data. *Rangeland Ecol. Manage.* 61, 412–418.
- 573 Sauer, J.R., Hines, J.E., Fallon, J.E., Pardieck, K.L., Ziolkowski, D.J., Jr, Link, W.A., 2017. The

574 North American breeding bird survey, results and analysis 1966--2015. Version 02.07.  
575 2017. Laurel, MD: USGS Patuxent Wildlife Research Center. 2017.

576 Schroeder, M.A., Aldridge, C.L., Apa, A.D., Bohne, J.R., Braun, C.E., Bunnell, S.D., Connelly,  
577 J.W., Deibert, P.A., Gardner, S.C., Hilliard, M.A., Kobriger, G.D., McAdam, S.M.,  
578 McCarthy, C.W., McCarthy, J.J., Mitchell, D.L., Rickerson, E.V., Stiver, S.J., 2004.  
579 Distribution of sage-grouse in North America. *Condor* 106, 363–376.

580 Severson, J.P., Hagen, C.A., Maestas, J.D., Naugle, D.E., Forbes, J.T., Reese, K.P., 2017a.  
581 Effects of conifer expansion on greater sage-grouse nesting habitat selection. *J. Wildl.*  
582 *Manage.* 81, 86–95.

583 Severson, J.P., Hagen, C.A., Maestas, J.D., Naugle, D.E., Forbes, J.T., Reese, K.P., 2017b.  
584 Short-Term Response of Sage-Grouse Nesting to Conifer Removal in the Northern Great  
585 Basin. *Rangeland Ecol. Manage.* 70, 50–58.

586 Severson, J.P., Hagen, C.A., Tack, J.D., Maestas, J.D., Naugle, D.E., Forbes, J.T., Reese, K.P.,  
587 2017c. Better living through conifer removal: A demographic analysis of sage-grouse vital  
588 rates. *PLoS One* 12, e0174347.

589 Shriver, R. K., C. B. Yackulic, D. M. Bell, and J. B. Bradford. 2021. Quantifying the  
590 demographic vulnerabilities of dry woodlands to climate and competition using rangewide  
591 monitoring data. *Ecology* 102, e03425.

592 Smith, I.T., Knetter, S.J., Svancara, L.K., Karl, J.W., Johnson, T.R., Rachlow, J.L., 2021.  
593 Overlap Between Sagebrush Habitat Specialists Differs Among Seasons: Implications for  
594 Umbrella Species Conservation. *Rangeland Ecol. Manage.* 78, 142–154.

595 Smith, I.T., Rachlow, J.L., Svancara, L.K., McMahan, L.A., Knetter, S.J., 2019. Habitat  
596 specialists as conservation umbrellas: Do areas managed for greater sage- grouse also

597 protect pygmy rabbits? *Ecosphere* 10, e02827.

598 Sweet, S.K., Asmus, A., Rich, M.E., Wingfield, J., Gough, L., Boelman, N.T., 2015. NDVI as a  
599 predictor of canopy arthropod biomass in the Alaskan arctic tundra. *Ecol. Appl.* 25, 779–  
600 790.

601 Theobald, D.M., Harrison-Atlas, D., Monahan, W.B., Albano, C.M., 2015. Ecologically-  
602 Relevant Maps of Landforms and Physiographic Diversity for Climate Adaptation Planning.  
603 *PLoS One* 10, e0143619.

604 Thornton, P.E., Thornton, M.M., Mayer, B.W., Wilhelmi, N., Wei, Y., Devarakonda, R., Cook,  
605 R., 2012. Daymet: Daily surface weather on a 1 km grid for North America, 1980-2008,  
606 Oak Ridge National Laboratory (ORNL) Distributed Active Archive Center for  
607 Biogeochemical Dynamics (DAAC. [adsabs.harvard.edu](https://adsabs.harvard.edu)).

608 Zeller, K.A., Cushman, S.A., Van Lanen, N.J., Boone, J.D., Ammon, E., 2021. Targeting conifer  
609 removal to create an even playing field for birds in the Great Basin. *Biol. Conserv.* 257,  
610 109130.

611 Table 1. Songbird species used to develop species distribution models and resulting spatial  
 612 predictions from Breeding Bird Survey (BBS) Data. Sagebrush- and woodland-dependent  
 613 species were considered for modeling, and we used BBS survey-wide estimated trends from  
 614 1966-2015 to identify if populations were increasing, decreasing based on direction of 80% of  
 615 the credible intervals ([CI] \* denotes CI overlapping 0; Sauer et al., 2017). We only modeled  
 616 species if they were detected at least 5 times within Commission for Environmental Cooperation  
 617 Level 3 ecoregions from 2011-2016 (supplemental Fig. 1 for map and corresponding ecoregion  
 618 names).

| Species                 | Habitat   | BBS Trend                       | Ecoregions                                                                     |
|-------------------------|-----------|---------------------------------|--------------------------------------------------------------------------------|
| Brewer's Sparrow        | Sagebrush | Declining; -1.01 (-1.89, -0.22) | 1, 2, 4, 5, 6, 7, 8, 9, 10, 11, 13, 14, 15, 16, 17, 18, 19, 20, 21, 22, 23, 24 |
| Green-tailed Towhee     | Sagebrush | Declining*; -0.31 (-0.83, 0.19) | 1, 2, 4, 5, 6, 9, 11, 13, 16, 18, 19, 20, 21, 23, 24                           |
| Sagebrush Sparrow       | Sagebrush | Increasing*; 0.43 (-3.51, 4.51) | 1, 2, 5, 6, 8, 13, 16, 18, 20, 21, 23, 24                                      |
| Sage Thrasher           | Sagebrush | Declining; -1.20 (-1.93, -0.47) | 1, 2, 5, 6, 8, 9, 11, 13, 16, 17, 18, 19, 20, 21, 23, 24                       |
| Ash-throated Flycatcher | Woodland  | Increasing; 1.10 (0.68, 1.52)   | 1, 2, 3, 4, 5, 6, 8, 9, 12, 14, 16, 19, 21, 22, 23, 24                         |
| Gray Flycatcher         | Woodland  | Increasing; 2.43 (1.45, 3.51)   | 1, 2, 5, 6, 7, 8, 9, 13, 14, 16, 19, 21, 23, 24                                |
| Gray Vireo              | Woodland  | Increasing; 2.10 (-0.28, 4.24)  | 1, 5, 6, 14, 21, 23, 24                                                        |
| Juniper Titmouse        | Woodland  | Increasing*; 0.28 (-1.14, 1.54) | 1, 5, 6, 9, 14, 16, 21, 22, 23, 24                                             |
| Pinyon Jay              | Woodland  | Declining; -3.69 (-5.08, -2.37) | 1, 2, 5, 6, 9, 13, 14, 16, 18, 19, 21, 23, 24                                  |

620 Table 2. Candidate variables used to describe heterogeneity in Breeding Bird Survey stop level  
 621 occurrence and count data. Variables were represented as either a mean value across circular  
 622 spatial windows, or summarized over a temporal window when data was available.

| Variable (abbreviation)                 | Spatial Window   | Temporal Window |
|-----------------------------------------|------------------|-----------------|
| Sagebrush (sage) <sup>a</sup>           | 120m, 1km, 6.4km | NA              |
| Grassland/Herbaceous (herb)             | 120m, 1km, 6.4km | NA              |
| Shrubland (shrb) <sup>a</sup>           | 120m, 1km, 6.4km | NA              |
| Conifer (conf) <sup>a</sup>             | 120m, 1km, 6.4km | NA              |
| Crop/Disturbed (dist) <sup>a</sup>      | 120m, 1km, 6.4km | NA              |
| Pinyon/Juniper (piju) <sup>a</sup>      | 120m, 1km, 6.4km | NA              |
| Scrubland/Woodland (scrb) <sup>a</sup>  | 120m, 1km, 6.4km | NA              |
| Riparian (ripa) <sup>a</sup>            | 120m, 1km, 6.4km | NA              |
| Burned Area (burn) <sup>b</sup>         | 120m, 1km, 6.4km | 5, 10, 15 years |
| Avg Min Temp (tmin) <sup>c</sup>        | 1km              | May 15 - Jul 15 |
| Avg Max Temp (tmax) <sup>c</sup>        | 1km              | May 15 - Jul 15 |
| Total Spring Precip (sprp) <sup>c</sup> | 1km              | Mar 15 - Jul 15 |
| Total Winter Precip (wprp) <sup>c</sup> | 1km              | Dec 1 - Mar 14  |
| NDVI (ndvi) <sup>d</sup>                | 6.4km            | May 15 - Jul 15 |
| Elevation (elev) <sup>e</sup>           | 30m              | NA              |
| TRI (tri) <sup>f</sup>                  | 1km              | NA              |
| Multiscale TPI (tpi) <sup>g</sup>       | NA <sup>1</sup>  | NA              |
| PDSI (pdsi) <sup>h</sup>                | NA               | June            |

623  
 624 <sup>a</sup> Rollins (2009); <sup>b</sup> Eidenshink (2007); <sup>c</sup> Thornton (2012); <sup>d</sup> Landsat-7 imagery courtesy of the  
 625 U.S. Geological Survey; <sup>e</sup> Gesch (2002); <sup>f</sup> Riley (1999); <sup>g</sup> Theobald (2015); <sup>h</sup> Abatzoglou (2017).  
 626 <sup>1</sup> Index summarized from TPI calculated at 270m, 810m, and 2.43km (Theobald et al., 2015)

627 Table 3. Variables selected for use in models across species with shortened variable codes

628 identified in Table 2. Spatial scales (m) providing the best fit follow the variable name.

| Species                 | Topography Variables | Landcover Variables                                                                    | Weather-Climate Variables    | Fire Variable  |
|-------------------------|----------------------|----------------------------------------------------------------------------------------|------------------------------|----------------|
| Ash-throated Flycatcher | elev, tpi, tri       | scrb.6400, piju.1000, conf.6400, sage.6400, shrb.1000, herb.6400, ripa.120, dist.1000  | ndvi, psdi, tmax, wprp, sprp | fire.120 15yr  |
| Brewer's Sparrow        | elev, tpi, tri       | scrb.120, piju.120, conf.1000, sage.1000, shrb.1000, herb.6400, ripa.6400, dist.1000   | ndvi, pdsi, tmax, wprp, sprp | fire.6400 10yr |
| Gray Vireo              | elev, tpi, tri       | scrb.6400, piju.6400, conf.1000, sage.6400, shrb.6400, herb.1000, ripa.6400, dist.6400 | pdsi, tmax, wprp             | fire.6400 5yr  |
| Gray Flycatcher         | elev, tpi, tri       | scrb.6400, piju.1000, conf.120, sage.6400, shrb.6400, herb.1000, ripa.6400, dist.1000  | ndvi, pdsi, wprp, sprp       | fire.1000 15yr |
| Green-tailed Towhee     | elev, tpi, tri       | scrb.1000, piju.6400, conf.120, sage.1000, shrb.1000, herb.6400, ripa.1000, dist.6400  | ndvi, pdsi, tmin, wprp, sprp | fire.120 10yr  |
| Juniper Titmouse        | elev, tpi, tri       | scrb.6400, piju.6400, conf.6400, sage.1000, shrb.6400, herb.1000, ripa.6400, dist.1000 | ndvi, pdsi, tmin, wprp, sprp | fire.6400 10yr |
| Pinyon Jay              | elev, tpi, tri       | scrb.1000, piju.6400, conf.6400, sage.120, shrb.6400, herb.6400, ripa.6400, dist.1000  | ndvi, pdsi, wprp, sprp       | fire.120 10yr  |
| Sagebrush Sparrow       | elev, tpi, tri       | scrb.6400, piju.120, conf.120, sage.120, shrb.1000, herb.120, ripa.6400, dist.120      | ndvi, pdsi, tmin, wprp, sprp | fire.1000 15yr |
| Sage Thrasher           | elev, tpi, tri       | scrb.6400, piju.1000, conf.1000, sage.1000, shrb.1000, ripa.1000, dist.1000            | ndvi, pdsi, tmax, wprp       | fire.1000m.5yr |

629

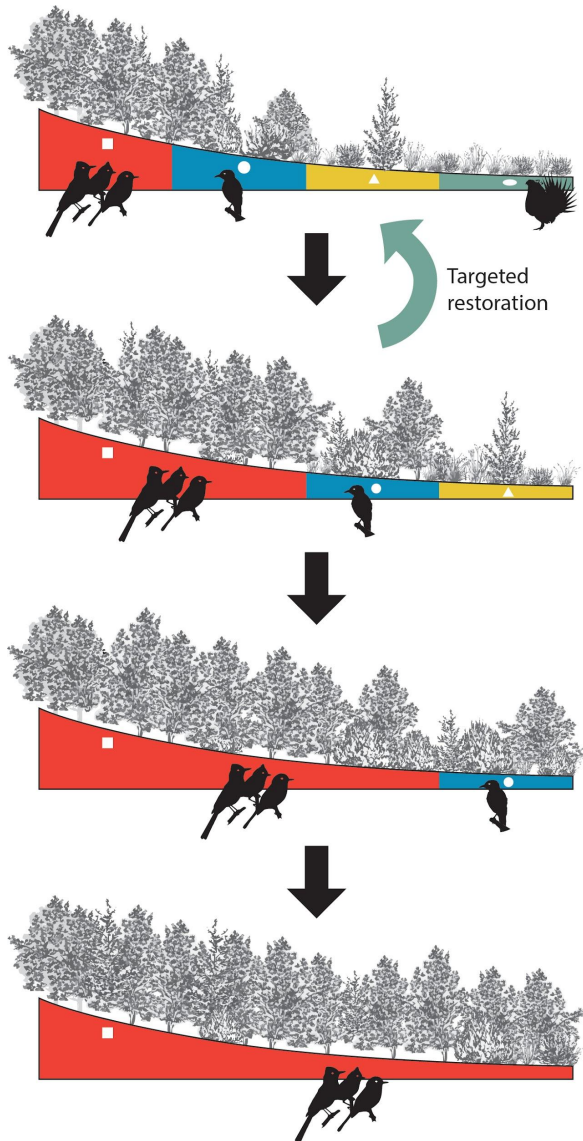

630

631 Figure 1. Hypothetical illustration depicting how conifer expansion and infill may impact  
632 habitats for both sagebrush-obligate and woodland-reliant birds. The top panel shows a  
633 landscape that supports a diversity of bird species partitioned by different ecological sites:  
634 persistent woodlands supporting dense forest birds (red/square), heterogeneous woodlands  
635 supporting birds reliant on more open stands, such as, pinyon jay (blue/circle), and sagebrush  
636 shrublands supporting obligate birds, such as, sage grouse where encroaching conifers are  
637 targeted for restoration (yellow/triangle to green/oval). Remaining panels depict shifting habitat  
638 niches as conifer expansion and infill, without intervention, displace species like pinyon jay and



639 sage grouse that rely on mixed woodlands or treeless shrublands. BBS trends lend support to  
640 this hypothetical scenario as both pinyon jay and sagebrush-obligates have been in decline,  
641 while other songbirds reliant on persistent pinyon-juniper woodlands have been increasing  
642 (Table 1).

A) BRSP Predicted Count

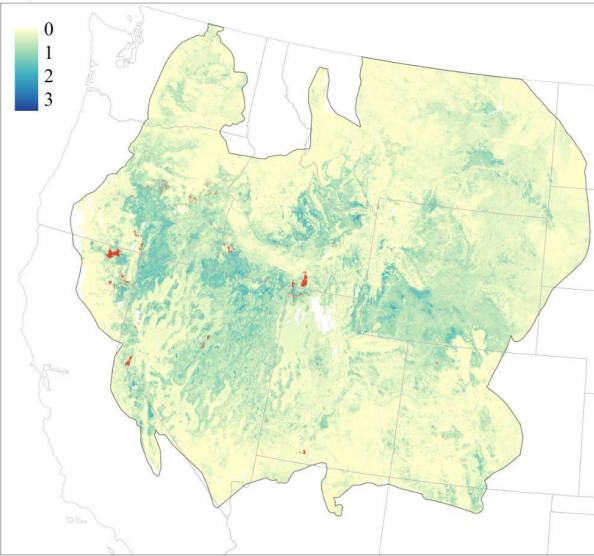

B) GTTO Predicted Count

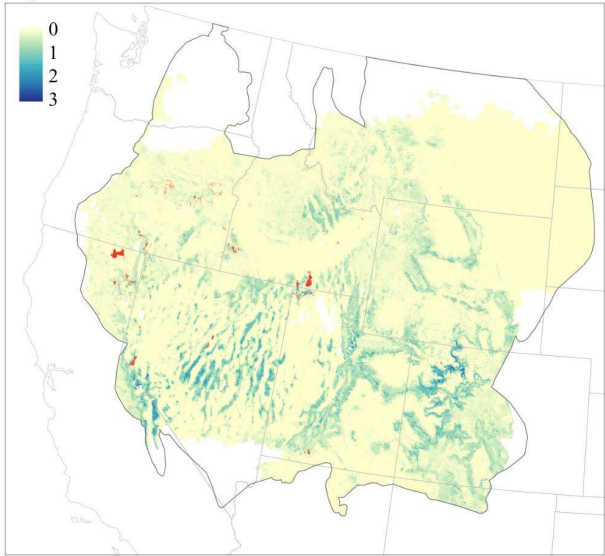

C) SATH Predicted Count

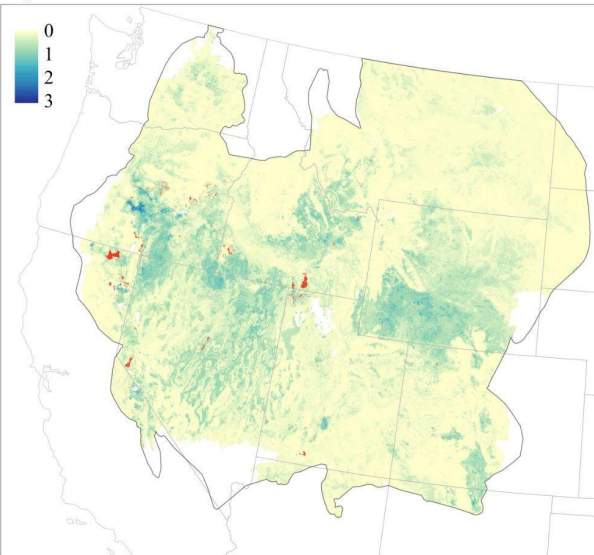

D) PIJA Predicted Count

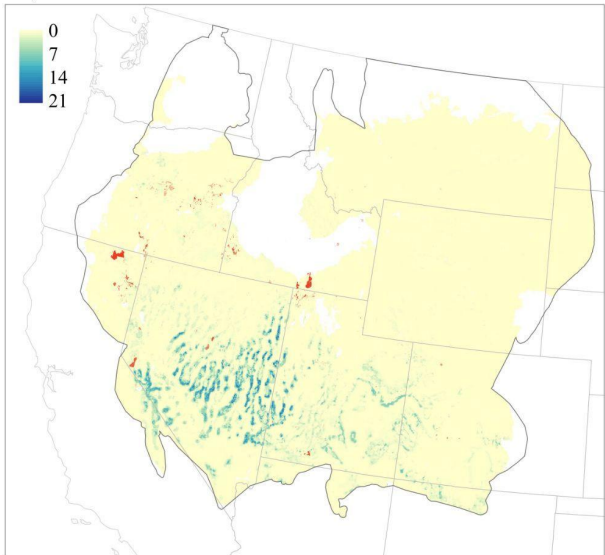

643

644 Figure 2. Predicted counts for each of the modeled species with significant declines identified

645 from BBS trends (Table 1) including , A) Brewer's sparrow (BRSP), , and B) green-tailed

646 towhee (GTTO), C) sage thrasher (SATH), and D) pinyon jay (PIJA). Conifer removal projects

647 contracted with the Sage Grouse Initiative are overlaid in red.

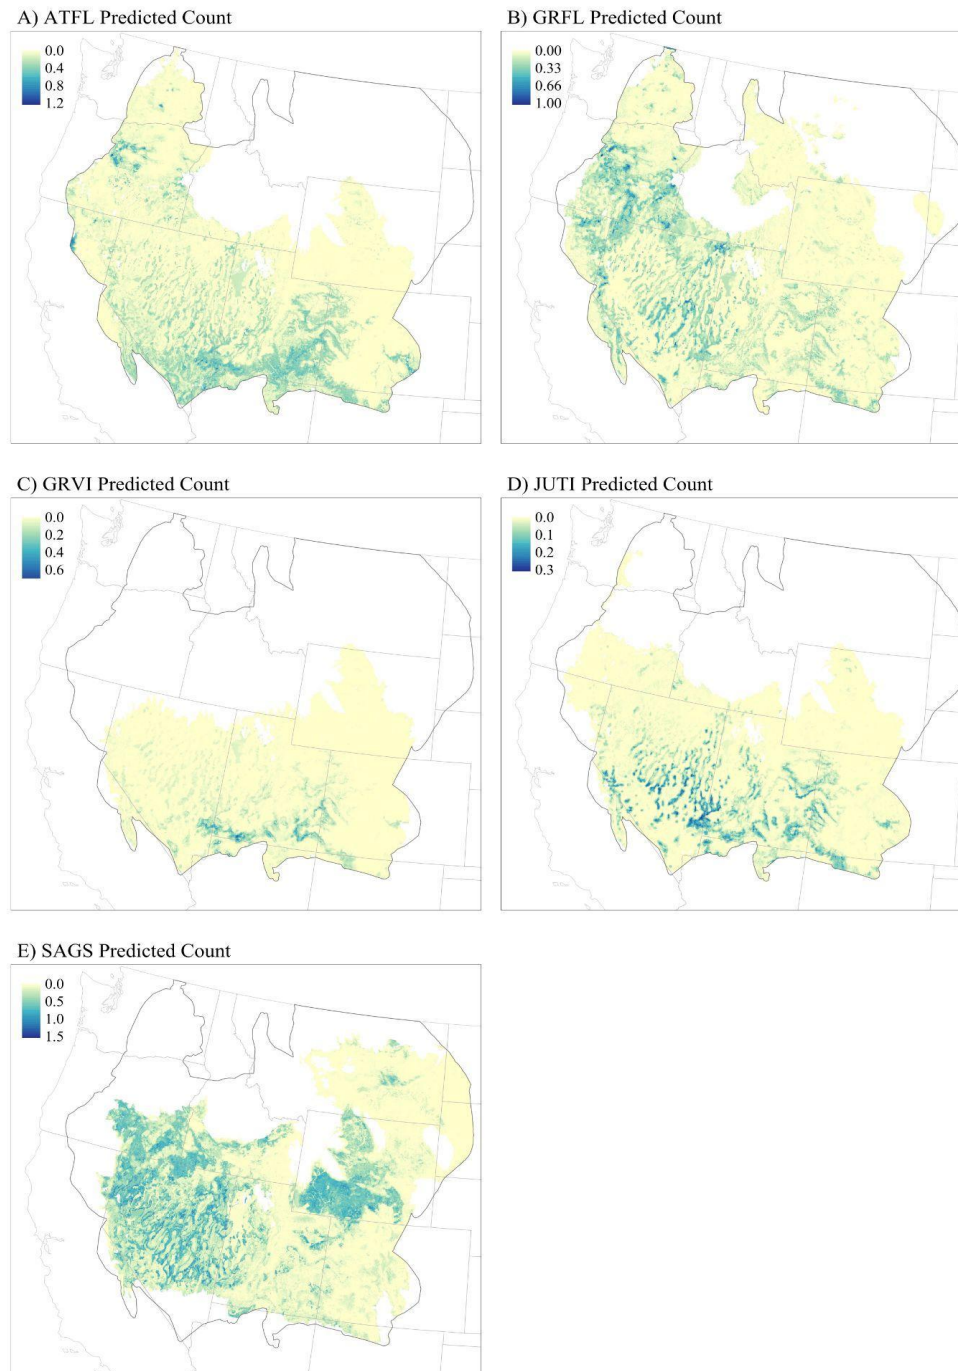

648

649 Figure 3. Predicted counts for each of the modeled species with stable to increasing trends  
650 identified from BBS trends (Table 1) including, A) ash-throated flycatcher (ATFL), B) gray  
651 flycatcher (GRFL), C) gray vireo (grvi), D) juniper titmouse (JUTI), and E) sage sparrow  
652 (SAGS).

653 Supplemental Table 1. Mean area under the curve (AUC) statistic and range calculated from k-  
654 folds cross-validation with 10 folds suggest good model fit across species.

| Species                 | AUC                  |
|-------------------------|----------------------|
| ash-throated flycatcher | 0.950 (0.942, 0.958) |
| Brewer's sparrow        | 0.922 (0.916, 0.927) |
| gray flycatcher         | 0.961 (0.953, 0.971) |
| gray vireo              | 0.968 (0.951, 0.980) |
| green-tailed towhee     | 0.945 (0.940, 0.951) |
| juniper titmouse        | 0.932 (0.885, 0.957) |
| pinyon jay              | 0.929 (0.906, 0.967) |
| sage sparrow            | 0.964 (0.957, 0.971) |
| sage thrasher           | 0.946 (0.941, 0.949) |

655

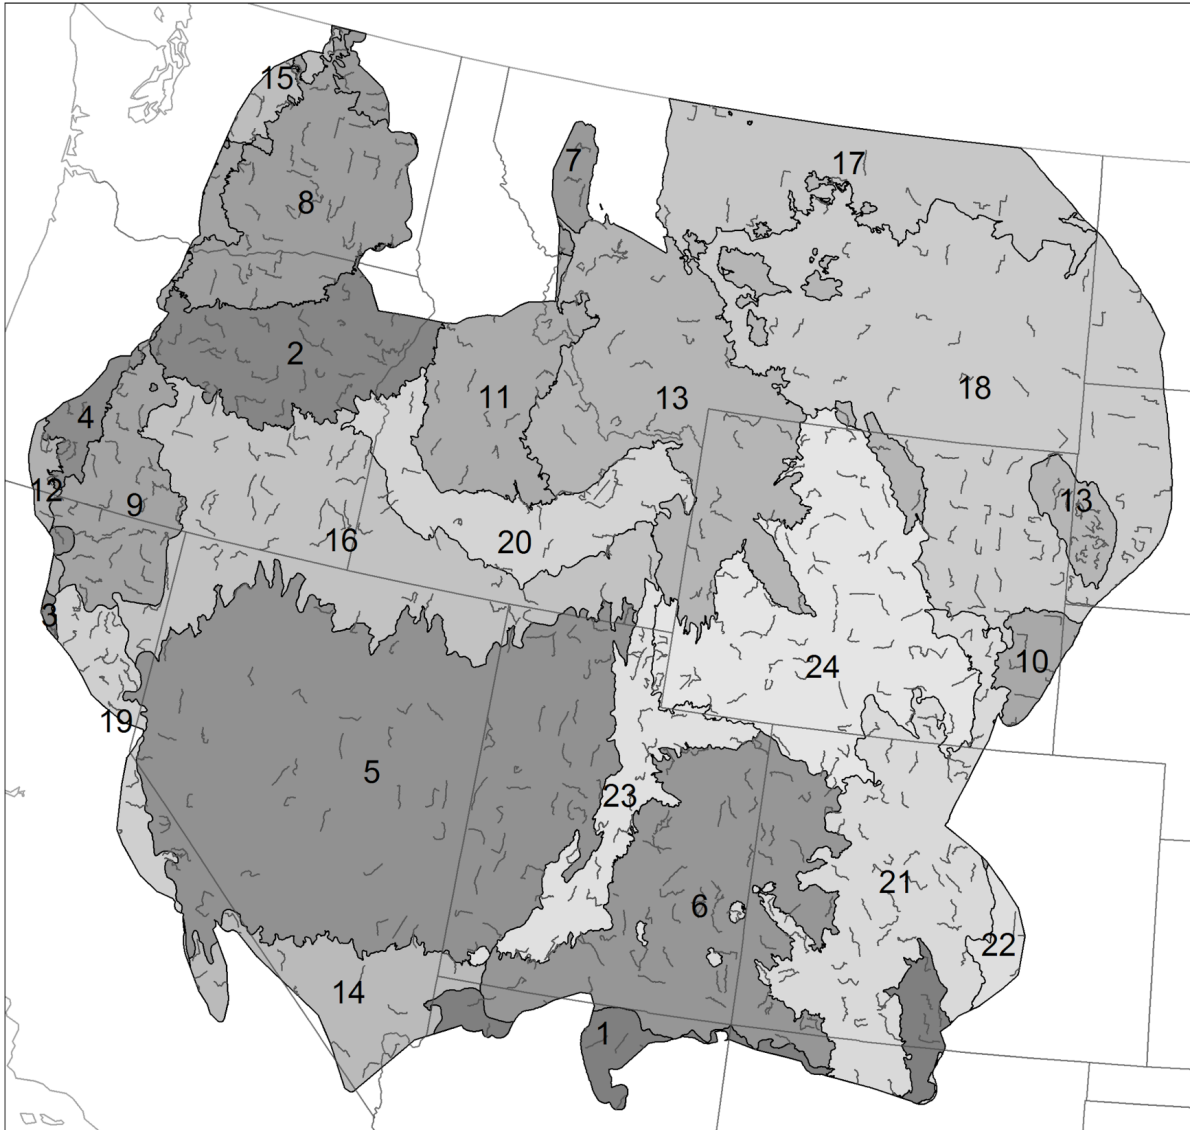

656

657 Supplemental Figure 1. Sampling frame was composed of the US portion of the sagebrush  
658 ecosystem as identified by all sagebrush land cover types, with the addition of existing sage  
659 grouse Priority Areas for Conservation and management zones (COT 2013), and the historic sage  
660 grouse species range (USGS FRESC 2002), which encompassed 625 Breeding Bird Survey  
661 routes. We restricted species models Commission for Environmental Cooperation Level 3  
662 ecoregions where they were detected at least 5 times from 2011-2016, which implicated: 1-  
663 Arizona/New Mexico Plateau; 2-Blue Mountains; 3-California Coastal Sage; Chaparral, and Oak

664 Woodlands; 4-Cascades; 5-Central Basin and Range; 6-Colorado Plateaus; 7-Columbia  
665 Mountains/Northern Rockies; 8-Columbia Plateau; 9-Eastern Cascades Slopes and Foothills; 10-  
666 High Plains; 11-Idaho Batholith; 12-Klamath Mountains; 13-Middle Rockies; 14-Mojave Basin  
667 and Range; 15-North Cascades; 16-Northern Basin and Range; 17-Northwestern Glaciated  
668 Plains; 18-Northwestern Great Plains; 19-Sierra Nevada; 20-Snake River Plain; 21-Southern  
669 Rockies; 22-Southwestern Tablelands; 23-Wasatch and Uinta Mountains; and 24-Wyoming  
670 Basin.
